# Supplementary material for: Karyotype Analysis, Genomic and Fluorescence In Situ Hybridization (GISH and FISH) Reveal the Ploidy and Parental Origin of Chromosomes in Paeonia Itoh Hybrids
Source: MDPI journal article supplement (doi:10.3390/ijms231911406), 2022-09-27
Supplement: s1 [file s1]

**Table S1.** Basic information of the materials involved in this study

| Code | Name                                   | Origin or parents' information*                                       | Experiments conducted (filled by ●) |                    |      |      |
|------|----------------------------------------|-----------------------------------------------------------------------|-------------------------------------|--------------------|------|------|
|      |                                        |                                                                       | Flow cytometric analysis            | Karyotype analysis | GISH | FISH |
| M01  | <i>P. delavayi</i> var. <i>lutea</i>   | Wild species collected from Yunnan, China                             | ●                                   | ●                  | ●    |      |
| M02  | <i>P. delavayi</i>                     | Wild species collected from Yunnan, China                             | ●                                   | ●                  |      |      |
| M03  | <i>P. rockii</i>                       | Wild species collected from Gansu, China                              | ●                                   | ●                  |      |      |
| M04  | <i>P. ostii</i>                        | Wild species collected from Anhui, China                              | ●                                   | ●                  |      |      |
| M05  | <i>P. × lemoinei</i> 'High Noon'       | <i>P. delavayi</i> var. <i>lutea</i> × <i>P. suffruticosa</i> cv.     | ●                                   | ●                  | ●    |      |
| M06  | <i>P. suffruticosa</i> 'Luo Yang Hong' | Traditional cultivar collected from Henan,                            | ●                                   | ●                  | ●    | ●    |
| P01  | <i>P. veitchii</i>                     | Wild species collected from Sichuan, China                            | ●                                   | ●                  |      |      |
| P02  | <i>P. lactiflora</i> 'Bai Shao'        | Common cultivar collected from Anhui, China                           | ●                                   | ●                  | ●    |      |
| P03  | <i>P. lactiflora</i> "Yang Fei Chu Yu" | Traditional cultivar collected from Shandong,                         | ●                                   | ●                  | ●    |      |
| P04  | <i>P. sp.</i> 'Red Charm'              | <i>P. officinalis</i> 'Rubra Plena' × <i>P. lactiflora</i> cv.        | ●                                   | ●                  |      |      |
| P05  | <i>P. mairei</i>                       | Wild species collected from Xinjiang, China                           | ●                                   | ●                  |      |      |
| P06  | <i>P. officinalis</i>                  | Wild species collected from the Netherlands                           | ●                                   | ●                  | ●    |      |
| It01 | Going Bananas                          | Unknown × Unknown                                                     |                                     | ●                  |      |      |
| It02 | Bartzella                              | White <i>lactiflora</i> double × Reath hybrid (tree peony)            |                                     | ●                  |      |      |
| It03 | Viking Full Moon                       | <i>P. lactiflora</i> × Yellow <i>lutea</i> hybrid                     |                                     | ●                  | ●    |      |
| It04 | Garden Treasure                        | <i>P. lactiflora</i> , cultivar × <i>P. Lutea</i> Hybrid Alice        |                                     | ●                  | ●    | ●    |
| It05 | Prairie Charm                          | Miss America × <i>P. Lutea</i> Hybrid Alice Harding                   |                                     | ●                  |      |      |
| It06 | Morning Lilac                          | Martha W. seeding × Golden Era. ( <i>Lutea</i> hybrid)                |                                     | ●                  |      |      |
| It07 | Cora Louise                            | <i>P. lactiflora</i> , white double × Reath hybrid (tree peony)       |                                     | ●                  |      |      |
| It08 | Julia Rose                             | Unknown × Unknown                                                     |                                     | ●                  | ●    | ●    |
| It09 | Court Jester                           | <i>P. lactiflora</i> 'Martha W.' × D-256 Tria seedling                |                                     | ●                  | ●    |      |
| It10 | Lemon Dream                            | <i>P. lactiflora</i> 'Martha W.' × Golden Era. ( <i>Lutea</i> hybrid) |                                     | ●                  |      |      |
| It11 | Sequestered Sunshine                   | Miss American × D-74                                                  |                                     | ●                  |      |      |
| It12 | Yellow Crown                           | <i>P. lactiflora</i> 'Kakoden' × <i>P. Lutea</i> Hybrid Alice         |                                     | ●                  |      |      |
| It13 | Ballerena de Saval                     | Unknown × Unknown                                                     |                                     | ●                  |      |      |
| It14 | Sugar Plum Fairy                       | Unknown × Unknown                                                     |                                     | ●                  |      |      |

|      |                                        |                                                                           |   |
|------|----------------------------------------|---------------------------------------------------------------------------|---|
| It15 | Lollipop                               | Anderson's seedling × D-79                                                | • |
| It16 | Magical Mystery Tour                   | Martha W. seedling × Golden Era. ( <i>Lutea</i> hybrid)                   | • |
| It17 | Scarlet Heaven                         | Martha W. seedling × Thunderbolt                                          | • |
| It18 | Dark Eyes                              | <i>P. lactiflora</i> 'Mikado' × <i>P. delavayi</i>                        | • |
| /    | <i>P. suffruticosa</i> 'Chojuraku'     | Japanese cultivar collected from Henan, China                             | • |
| /    | <i>P. suffruticosa</i> 'Nong Yuan Jin' | <i>P. delavayi</i> var. <i>lutea</i> × <i>P. suffruticosa</i> 'Chojuraku' | • |
| /    | Pepper cv. Zunla-1                     | Fresh leave obtained from Dr. Hailong Yu in CAAS                          | • |

\*The parents' information of Itoh hybrids is obtained from the online data of American Peony Society (<https://www.americanpeonysociety.org>) as maternal parent × paternal parent.
